# Supplementary material for: Downregulated exosome-associated gene FGF9 as a novel diagnostic and prognostic target for ovarian cancer and its underlying roles in immune regulation
Source: publisher site journal article supplement (doi:10.18632/aging.203905), 2022-02-21
Supplement: Supplementary file [file aging-v14i4-203905-supplementary-material-SD4.pdf]

## SUPPLEMENTARY TABLES

**Supplementary Table 3. The top 19 genes positively correlated with FGF9 in ovarian cancer.**

---

|       |         |          |       |
|-------|---------|----------|-------|
| YAP1  | PGR     | BRCA2    | ATM   |
| IRS1  | RPS6KB1 | DIRAS3   | CCND1 |
| KIT   | HSPA1A  | EIF4EBP1 | CDH2  |
| SMAD3 | BCL2    | CAV1     | JUN   |
| SRC   | MAPK9   | COL6A1   |       |

---

**Supplementary Table 4. The top 20 genes negatively correlated with FGF9 in ovarian cancer.**

---

|        |        |        |       |
|--------|--------|--------|-------|
| SQSTM1 | EIF4G1 | MYH9   | LCK   |
| PRDX1  | PIK3CA | STAT5A | GAB2  |
| SMAD1  | SLC1A5 | BRAF   | EIF4E |
| CCNE1  | CCNB1  | SYK    | TP53  |
| ASNS   | EEF2K  | G6PD   | PREX1 |

---
