# Supplementary material for: Downregulated exosome-associated gene FGF9 as a novel diagnostic and prognostic target for ovarian cancer and its underlying roles in immune regulation
Source: Aging (Albany NY). 2022 Feb 21;14(4):1822–35. doi: 10.18632/aging.203905 (PMC8908935; doi:10.18632/aging.203905)
Supplement: Supplementary Table 1 [file aging-14-203905-s002.xlsx]

## Sheet: GSE26712+UP
Supplementary Table 1. The upregulated genes and downregulated genes in the two GEO datasets.
Gene.symbol
SNORA68
CALR
PPDPF
RPL37A
CD24
GSTP1
NOTCH3
PFN1
PKM
RPS7
MIR1282
BCL2L2-PABPN1
HIST2H2AA4
S100A13
PRMT1
GRINA
WFDC2
LOC100506248
SOX17
CLDN3
IGFBP2
H2AFX
PEA15
ATP5H
MECOM
CRABP2
HMGA1
YWHAE
UBE2C
ELF3
ZNF593
KDELR1
HSPG2
LOC101929219
MIR7113
CLDN4
SOX9
SLC52A2
C1orf106
FOLR1
S100A11
S100A6
UQCRQ
NT5DC2
BCAM
ATP2A2
MUC1
PRSS8
H2BFS
KLK8
SLC39A4
RHOB
COX7B
KLK6
LSM4
JUNB
CP
CDC20
COL1A1
FXYD3
CKS2
ISG15
SCGB2A1
S100A2
MMP11
MDK
HIST1H1C
LCN2
IFI6
TAGLN
LYPD1
IFI27
DEFB1
MMP7
ENO1
COL6A2
CYAT1
INS-IGF2
IGLV1-44
IGHA2
IGLC1
MIR8071-2

## Sheet: GSE26712+DOWN
Gene.symbol
LGALS8
BNC1
KDR
GPM6A
NELL2
HNRNPD
TMEM255A
MNDA
LOC101930363
SLC4A4
NPY1R
REEP1
PSD3
NKX3-1
PRG4
CLDN15
CLEC4M
S100PBP
DFNA5
ANXA8L1
WNT2B
SLC46A3
TFPI2
PROCR
LHX2
C21orf62
STK26
PLCE1
ZNF45
CALB2
DSC3
ATP10D
SPOCK1
FGF13
PDE8B
DCUN1D4
ARHGAP44
PCDH9
ATP8A1
AOX1
FRY
CREBL2
LOC101928635
MAP3K8
WNT5A
BCHE
GCOM1
ME1
BTAF1
NAP1L3
RTN1
MAF
ARMCX1
AQP9
TRPC1
WSB1
LOC101926921
GLS
SNCAIP
DPYD
ZNF330
PHACTR2
RSRP1
ARAP2
GSAP
PLSCR4
FRMD4B
SEMA5A
RHOT1
CHGB
NT5C1B-RDH14
PAXBP1
EPS15
PLPP1
FAM13B
UFSP2
EFEMP1
GALNT12
ZDHHC17
GFPT2
SLC39A8
ITGAM
FZD7
CHRDL1
RECK
LGALS2
PCOLCE2
MEIS2
ATMIN
OLFML1
PROS1
TCEAL2
PDPN
MARCO
MET
HEG1
DSE
PGRMC2
DAPK1
PREPL
SNORD45C
RAP2C
GALC
PNISR
PDGFD
ARHGAP6
CLK1
FEZ2
ADAMTS3
KAT2B
GPR137B
HBG2
ABCA8
TPD52L1
GCA
HOXC6
PNRC2
BICC1
ATXN1
DDX17
EFHC1
GHR
ECM2
DMD
TMX4
LAMA4
EZR
N4BP2L2
CSGALNACT1
SERPINB9
QKI
RGS4
SEL1L3
SFRP1
TLE4
RNASE4
DIRAS3
MIR22
PKD2
OGN
GREB1
MEF2C
CPE
ZBTB20
ISOC1
HAS1
PTGER4
VPS13C
CAST
CAV2
GPRASP1
AMIGO2
SMARCA2
SNX7
ADGRG6
CFI
PURA
ANOS1
NSG1
RBM25
ATF1
TCF21
CPVL
SARAF
ANXA3
NR2F1
FLRT3
FGF9
PDZD2
METTL7A
ADAM9
PRKAR1A
ADH1B
ALDH1A1
TSPAN13
TSPYL1
DOCK4
CHMP2B
DPYSL2
DLG5
SOBP
LOC101929500
PDGFC
CIRBP
PRKAR2B
TJP2
SCG5
ANK3
LXN
IGFBP6
BAMBI
CAV1
HSD17B11
GAS1
ADH5
CHMP5
PODXL
CFHR1
PTPRC
ID4
ACSL1
GNG11
GABARAPL3
GATA6
CFH
PLCB1
LUC7L3
IL6ST
WT1
SEMA3C
PLIN2
LAMB1
ZFPM2
PTGIS
TOB1
LIPA
HBB
CLIC5
PRNP
TSPAN8
HBA2
SULF1
RARRES1
HP
NR2F2
PEG3
UPK3B
KLF4
DCN
HPR
GJA1

## Sheet: GSE18520+UP
Gene.symbol
C16orf45
BEST1
SLC5A1
RNF187
PAK1
LOC171391
RTP3
SETD5
ELL3
CPEB1-AS1
NDUFV1
HMGA1
RBM8A
HAGLR
MB21D1
KCNH2
MIR6778
NFIA-AS2
LRRC18
LZTS2
SMDT1
LOC101927377
GOT2
RANBP1
AGPAT1
CHTOP
UBAC2-AS1
CYP1B1
PRKCQ-AS1
SYNE2
ARHGEF12
HIF3A
NDUFB11
ZNF503
LOC101930404
SPIRE2
AP1S2
ASB13
NOTCH1
SH3YL1
KIAA0040
WDR26
SLC4A2
UBE2D1
LZTS3
ERICH3
CLK2
TNNT3
MECOM
BIRC6
BBOX1
NADSYN1
SMAP1
SUSD2
NELFCD
FBLIM1
CLUH
DPH5
PUM2
LOC101928896
CACNB4
ZNF783
VPS52
CD24
KLHL14
LINC01296
SOX17
OSER1-AS1
RRP12
VPS37D
APPL1
MCM10
MIAT
PML
ARHGEF2
HMGB1
RTBDN
TIGD4
DDX20
MAGEF1
LOC101060391
SPTAN1
LOC101929219
MLX
TPH2
ZNF302
NOG
LOC644794
STS
ANKH
RPS10P7
CLDN3
CALML4
VWA3A
GATAD2B
GRHL2
CAPSL
SPG21
BCAP29
ELF3
POR
LOC647070
LYPD6B
ACSM5
VAMP4
MYLK-AS1
WFDC2
MMP24
NEK4
NEK2
CNOT11
TMEM139
FOXF2
FRG1EP
AFTPH
IKBKE
LOC283177
SGSM1
DLX6-AS1
LOC339666
C9orf85
CP
SPRR4
YEATS2
DDX17
RNF32
E2F1
MPZL2
HCN3
IDO1
FOXM1
NES
BACE1
PLA2G2E
SMIM22
OR51B2
LINC00629
UBQLN4
SLC6A12
H3F3A
ESM1
MAP3K12
AK7
LATS2
PGD
LOC101928595
LOC100288637
RALYL
SLC39A1
ARHGEF15
LOC105373958
GHRHR
SLC52A2
ARMC3
MYH14
ARL10
KLF12
KIF14
ZNF628
GLP1R
SIM1
SYT7
HIST1H2BC
CUBN
CLDN4
NDOR1
C1orf106
FRMPD3
FXYD3
TIMELESS
PAK3
RNASET2
CYYR1
MIR22
AFF2
RHOF
PPM1F
LINC01144
KIAA1107
FOLR1
MALL
C11orf63
SUSD4
PSAT1
SH3BP5L
SOD3
MAGI1
SMURF1
TOR1AIP2
DLGAP5
TMEM67
LOC101928747
EHF
NRXN1
BTBD11
PAX8
ZNF474
SORD
PNPLA3
PLCB1
KIF20A
CENPO
ATP5SL
MIP
TMEM212
SCGB2A1
GOLGA7B
GSN
ZHX2
FILIP1
BUB1
LAMB4
SSBP3
CLPB
GGT2
GPM6B
LPAR3
PAK4
FAM83D
MAT1A
ADPRHL1
AK8
TTK
DKFZp451B082
AIF1L
FKSG49
IRF6
TRIP13
PMP2
CENPF
KIAA1161
ZNF253
CARD14
CEP55
NCAPG
PTPRB
TMEM174
ZNF154
PPIL2
SLC4A11
CUX1
WWC2-AS2
TNS4
SCGB2B2
GTF2A1L
GMNC
RNF157-AS1
UGT2B28
BLACAT1
DTL
TBX20
CATIP-AS1
HMGB3
MKS1
CDCA5
KIF4A
S100A1
G6PC
ELL
FXR2
SLC2A1
EPCAM
FTSJ3
MON1B
PDE3A
LINC01545
LINC01569
ATP4A
LOC102725207
KIF11
EIF4G1
EPHX4
STON2
BUB1B
MDM2
TDO2
MATN1-AS1
GPRIN3
MELK
UBE2C
LIMS4
CDCA7
C10orf90
CRABP2
CTAG1A
MUC1
NOD2
SLC2A13
ST3GAL4
D21S2088E
E2F8
FAM163A
SULT1C2
SLC35F6
SHBG
LOC101928817
SOX9
HIST1H2AE
FCMR
CBS
HCG4B
LOC101928580
EFCAB1
EML4
MXD3
CELF1
CYTH2
FLJ41455
PAX9
APBB2
NDUFA7
CKS2
CDK1
PRC1
LOC101927884
FZD10
MRPL34
CDC20
KIF15
TOP2A
CENPK
EYA2
CDH6
LOC100130357
MMP7
LOC101928554
CCDC177
CELF3
C16orf70
FOXQ1
ECT2
LINC00673
CRADD
ELL2
ESCO2
ZNF611
MIS18BP1
TEPSIN
C8orf4
CCNB2
NUSAP1
S100A2
KLK6
C14orf105
SPRY1
TSPO2
LYNX1
ASRGL1
ACACB
PRR11
SYNPO2L
CPSF2
WDR11-AS1
KIAA0101
C12orf56
LYPD1
EPB41L5
THCAT158
GREM1
RGS1
LOC153684
ZNF551
PRSS2
IDI1
TMEM234
LOC102725315
CENPU
NR2F6
SLC26A7
CCNB1
LOC101928288
MAS1
PRKG2
RAD51AP1
DKK1
MINK1
U2SURP
CLSTN2
SPIB
ZNF492
BCL9L
HMGCS2
S100A13
LOC100506258
RRM2
BACE2
PGP
PRAME
MCM2
ST6GALNAC1
CALN1
RNF34
PFKP
NOL4L
MTHFD2
RTKN2
MTFR2
LOC100289361
LRCH4
MAL
TTC39A
LYPD3
UBA1
AUTS2
INHBB
GABRB3
KLK8
AURKB
PBK
LOC642533
LOC105376944
LOC101928718
KIAA1217
KDM8
GRIK3
LOC150051
PLEKHB1
MYB
CNBD1
DCDC2
ALDH3B2
DIS3L2
GLDC
C20orf203
LPIN1
CASR
DCAF12L1
FAM109B
TMTC1
LCN2
FUT3
SMG9
DUXAP10
CD1A
CLDN10
KIZ
ASXL2
RAPGEF3
RANBP10
DIRAS2
S100A14
MAGEA11
CCT8L2
VGLL1
TMEM214
HIST1H1C
HS3ST2
NRGN
SCGB1D1
DDN
PTX3
ZNF503-AS1
OR8G2
KCCAT333
DCHS2
LRRC71
PCDH7
NRTN
FAM30A
DIAPH2-AS1
PREX2
LONRF3
CLDN23
TFAP2A
SCGB1D2
ZNF614
ZMYM3
EIF1B-AS1
MEOX1
FAM107A
CNPY4
CEP85L
DEFB1
TRADD
ADRB3
SMR3B
LINC00284
PTH2R
LILRA4
CTCFL
RASL11A
LINC00574
LOC613266
NT5C2
SNORA74A
C9orf66
WDR72
LOC643923
LIX1
SST
PLEKHS1
PDCL2
IGF2BP3

## Sheet: GSE18520+DOWN
Gene.symbol
LINC00550
LINC01105
BNC1
ZNF252P
ITLN1
TNFRSF8
TTC12
KIAA2026
LHX9
CEP70
EFCAB14
HOTTIP
FITM1
SLC29A2
RNF2
LOC101927247
MAF
PDE8B
HAS1
CCDC60
FCAMR
RBFOX2
GADL1
VEPH1
PEX5L
CNPY1
TRAF1
SVEP1
ABCA8
ZBTB8B
REEP1
NKX3-1
MARK3
FOXP1-IT1
SPIN3
SYNPO2
PHF21A
MS4A4A
METTL7A
HAND2-AS1
HBB
SNX29P2
PABPC1L
SNCAIP
OGN
ANKHD1
GFPT2
SYT4
SNORA37
ADGRA2
HFE
SNX13
ZNF577
ANTXR2
TCP11L2
ZNF440
ATP5J2-PTCD1
SFXN3
SLC4A4
SH3GL1P2
MNDA
RPL36A
SLC6A19
MED13
NDUFB1
CPA1
AADACL2
DIRAS3
ARHGEF7
CLTC-IT1
CHGB
FAM86B3P
RIMS1
WNT2B
GATA5
UBR4
LOC100506236
CLDN15
ZNF207
PHC3
ALPK1
KNG1
ADIPOQ
ANK1
GAL3ST2
AKAP13
HBA2
GPD1
LOC101928002
NPY1R
AOX1
GPRASP1
SLC26A4
BCHE
RAPGEF2
TRAF3IP2
MYEF2
GDPD5
PRG4
PPM1K
TBX3
ABCB1
LGALS2
CLEC4M
FANCD2
INMT
GRB10
NFIX
SYT1
TMEM106A
HDAC9
DOCK5
ZNF844
HELQ
OLFM2
SYTL3
TCEAL2
AGTR1
KDR
SMPD3
TCEAL7
SLC12A4
S100A10
NRG1
ADAMTS9-AS1
ABCA5
LLGL2
SFRP1
LOC100132731
BTG4
TVP23A
WDR61
LARP7
PCOLCE2
RAPH1
MEG3
SNCA
PKD2
SRGAP2C
LINC00342
NUP153
DAPK1-IT1
ADH1B
SHISA3
MOV10L1
LOC100129476
CHD9
DDR2
PTPRZ1
CDK17
FRA10AC1
MBD1
CREBRF
FAM19A4
EMC1
PLIN5
DFNA5
SLC35G3
B3GALT2
MTUS1
LOC101927151
GOLGA6L2
RETSAT
EFNA5
LINC00116
LGALS8
EOGT
KLHDC1
ADH1C
PRSS35
POLR3G
STAT5B
EIF1
LOC101928274
LOC101928635
DSCAML1
UBAP1L
DSC3
DAZ4
AKAP12
TCF21
PCDH9
PROCR
WHAMMP2
NBR1
CMAHP
CD300A
PTPN14
SLC6A15
CALB2
CPB1
PARVA
MYO5B
LOC100287704
CSGALNACT1
ARHGAP18
ZNF471
TRMT61A
GATA4
DCLK1
CLYBL-AS2
PGM2L1
LOC100506718
LOC100507387
SEMA5A
THBD
MIRLET7D
LARP4B
RBL1
OGFOD1
FCER1G
LOC202181
DST
MGARP
LHX2
DSG4
BTD
LINC00628
ZBTB44
WNT16
MMAA
LOC55338
LSAMP
RAB11FIP3
HSPB11
TLDC1
MRPS27
HBG2
VAPA
MORF4L2
CHRDL1
UBE2D3
GDF11
TLR4
VSTM4
MIR4454
DTWD1
ANKRD29
PDS5B
GAREM1
MITF
SORBS2
HLF
TMEM116
HNRNPA1
POLR2J4
LOC101926921
HCN2
ADGRD1
PTGDR
OMD
UBE2NL
GAS1RR
ARMCX4
IREB2
RYR2
GREM2
TRIM2
SERTM1
MGC24103
LOC100996760
SLC25A37
MAX
MCTP2
SNX14
ZNF763
LRRFIP1
APC
OSR1
KCNT2
LOC101927723
UPK3BL
TMEM37
PDGFD
SPOCK1
RTN1
MALAT1
PLEKHH2
CLTC
VGLL3
TMEM255A
RANBP3
ILDR2
ANXA8L1
CEP68
LINC01133
ZDHHC8P1
ARX
IGFBP6
ANXA1
KDM4B
ZFAND5
SERF1B
UGGT2
NELL2
NR2F1-AS1
SNORA28
CDON
HHIP
LOC286191
ZNF226
CXorf57
SLC30A4
PHACTR1
DPP10-AS1
KLF2
ARHGEF6
LOC101930363
FGF1
JUNB
FCN1
PLCE1
DENND5B
MAP3K8
NCOA7
HMGA2
BDH2
RERG
CFLAR
MKL2
TTC37
MEOX2
KMO
HSD17B2
MARCO
TRPM7
TFPI
BCAR3
CYBB
PPP2CA
C8orf88
CNOT7
RBMS3
PEG3
PMP22
DLGAP2
CNN1
VTI1A
IL18
NALCN
PRDM5
PDZD2
RAB27B
GHR
AXL
ARHGAP23
TRIP11
C1S
SLC25A27
C16orf62
IRAK3
AKT3
FGF13
ABI3BP
CALCRL
ID3
MEDAG
CPED1
NT5E
HPSE
ITGA1
EZR
MTURN
LYVE1
DRP2
OLFML1
MMP21
SLC41A2
VPS26A
ALDH1A1
PTGER3
NEGR1
ENTPD3
MAN1C1
BAMBI
EHD1
HCFC2
RAB18
ZNF546
PCDH17
LOC101930349
PID1
CFI
C5AR1
GIPC2
DOCK11
ZC3H3
LMBRD1
LDB3
HBD
GTF2H5
MUM1L1
ATP10D
SBSPON
LINC00184
C8orf49
ZNF709
NLGN4X
PTPN13
CFC1B
DPP10
OGT
RNASE4
ARHGAP6
NPFF
TBC1D2
DIMT1
WSB1
AQP9
LOC102723809
CYP39A1
ZNF542P
HAUS2
OTUD1
LY75-CD302
DTNA
NUP54
ATRNL1
CCAR1
RGS4
SCD5
LINC00691
UFSP2
EFEMP1
GPR34
MMP28
PABPC5
DPT
LIMA1
MIR29C
GPM6A
LINC00857
SDPR
PRRX1
EMP3
NAP1L2
CLMP
NR3C1
CFHR2
CPEB4
EIF5A2
GABRB2
PPP2R2C
PLXNA4
TMEM43
ADGRF4
PRO2949
RASIP1
AASS
GPR85
RUNX1T1
RNF128
NXPH2
LOC101930400
SYNE3
CYP2U1
CNTN1
PTHLH
NAP1L3
PDGFB
SIGLEC11
FBXO22
GOPC
CD99L2
FABP4
NUDT12
PITPNC1
KIAA0226L
CAV1
IL26
DSE
CNTN4
LINC00472
KLF4
ME1
XPO6
KLF9
C1orf168
FLRT3
LOC102724814
FAM134B
SOBP
ERN1
CBLN4
GATM
HSD17B6
ECM2
LOC101926951
CLEC12A
ADAMTS3
C6orf120
TDRP
TMEM150C
VWC2
DHRS9
NUDC
PGR
DPYD
ADRA1A
MGP
BIVM
LAMA4
CXCL6
CYS1
NKAIN2
PTTG3P
GNG2
LOC105369167
COL14A1
S100A8
TRPC1
ZNF80
LOC101928995
FAM13C
MCC
SCN7A
ST8SIA1
RARRES1
TBX18
COL3A1
LRP2
PDE7A
TEF
DCN
C10orf54
LINC01279
NBEA
GYPE
ITM2A
ZNF747
CADPS2
FAM155A
CCDC80
LINC01116
PCSK5
ZFPM2
GAS1
FGF9
SUZ12P1
FRAS1
LRP1B
TMEM98
WDR17
TSPAN8
FOXL2
CNR1
RASSF3
SLIT2
TMEM200A
SDR16C5
PKHD1L1
C17orf51
CFH
PRKAR2B
NR2F1
TFG
NDN
LINC01541
TFPI2
DPP6
LOC728705
CLDN11
MDFIC
SLC16A4
STAR
PROS1
SMOC2
CFHR1
RASSF8-AS1
NRXN3
MSRB3
BEX1
MEIS2
ARRDC4
GATA6
DMD
STK26
CCND2
AKAP14
CRNDE
PGM5
WNT5A
SLC17A8
RSPO1
UPK3B
GRIA4
MICU3
SHOX2
KRT6A
C7
NEFH
ANKS1B
NRK
FAM150B
CCL18
CHGA
COL21A1
SFRP2
HPGD
