# Supplementary material for: Downregulated exosome-associated gene FGF9 as a novel diagnostic and prognostic target for ovarian cancer and its underlying roles in immune regulation
Source: Aging (Albany NY). 2022 Feb 21;14(4):1822–35. doi: 10.18632/aging.203905 (PMC8908935; doi:10.18632/aging.203905)
Supplement: Supplementary Table 2 [file aging-14-203905-s003.xlsx]

## Sheet: Sheet1
Supplementary Table 2. The co-expressed genes possessing positive and negative relationship with FGF9.
Query	Statistic	P-value	FDR (BH)
YWHAE|14-3-3_epsilon	0.0254442	0.696144	0.850307
YWHAZ|14-3-3_zeta	-0.0570963	0.380532	0.684567
EIF4EBP1|4E-BP1	0.0108895	0.867279	0.941658
EIF4EBP1|4E-BP1_pS65	0.146647	0.0236543	0.157424
EIF4EBP1|4E-BP1_pT37_T46	0.13814	0.0331615	0.177782
EIF4EBP1|4E-BP1_pT70	0.0538277	0.408441	0.703621
TP53BP1|53BP1	-0.0178326	0.784329	0.901045
ARAF|A-Raf_pS299	-0.078003	0.230581	0.54941
ACACA|ACC1	-0.0580799	0.372367	0.677989
ACVRL1|ACVRL1	0.0741519	0.254492	0.598988
PRKAA1|AMPK_alpha	-0.0520389	0.424214	0.71172
PRKAA1|AMPK_pT172	-0.0339277	0.602502	0.822591
AR|AR	0.104457	0.107966	0.359268
DIRAS3|ARHI	0.152838	0.0183074	0.132556
ARID1A|ARID1A	-0.0402917	0.544094	0.801604
ASNS|ASNS	-0.205792	0.0014113	0.0201625
ATM|ATM	0.133169	0.0400959	0.193463
TUBA1B|Acetyl-a-Tubulin-Lys40	0.0682768	0.294177	0.6333
ANXA1|Annexin-1	0.0489693	0.45209	0.733222
ANXA7|Annexin_VII	0.024287	0.709324	0.850307
AXL|Axl	-0.0271482	0.686125	0.850307
BRAF|B-Raf	-0.152533	0.0185441	0.132556
BRCA2|BRCA2	0.157704	0.0169218	0.132556
BRD4|BRD4	-0.0878817	0.190036	0.50413
BAD|Bad_pS112	0.0153251	0.814059	0.918792
BAK1|Bak	-0.0107907	0.868472	0.941658
BAP1|Bap1-c-4	-0.0280505	0.666796	0.84247
BAX|Bax	-0.0316992	0.626556	0.82548
BCL2|Bcl-2	0.180468	0.0052314	0.050483
BCL2L1|Bcl-xL	0.0636166	0.328444	0.642245
BECN1|Beclin	-0.0448902	0.490676	0.757371
BID|Bid	0.073244	0.26037	0.60544
BCL2L11|Bim	0.107252	0.0988072	0.346723
RAF1|C-Raf	-0.101302	0.119092	0.383264
RAF1|C-Raf_pS338	-0.0168446	0.796009	0.909052
MS4A1|CD20	0.051641	0.42777	0.71172
PECAM1|CD31	-0.126758	0.0508061	0.210179
ITGA2|CD49b	-0.00163808	0.979945	0.981097
CDK1|CDK1	-0.127456	0.0495338	0.210179
CDK1|CDK1_pY15	-0.016459	0.806476	0.915588
CASP7|Caspase-7_cleavedD198	-0.126553	0.0511834	0.210179
CASP8|Caspase-8	-0.0842059	0.195484	0.50413
CAV1|Caveolin-1	0.139613	0.0313144	0.172676
CHEK1|Chk1	0.024903	0.702297	0.850307
CHEK1|Chk1_pS345	0.0542024	0.405181	0.703621
CHEK2|Chk2	-0.0989533	0.127939	0.398262
CHEK2|Chk2_pT68	-0.0621376	0.339837	0.642245
CLDN7|Claudin-7	-0.0648124	0.319415	0.642245
COL6A1|Collagen_VI	0.137141	0.0344669	0.179787
CCNB1|Cyclin_B1	-0.189947	0.00326353	0.0370507
CCND1|Cyclin_D1	0.13191	0.0420338	0.19497
CCNE1|Cyclin_E1	-0.207387	0.00129262	0.0201625
CCNE2|Cyclin_E2	-0.0642615	0.323555	0.642245
PARK7|DJ-1	0.0714714	0.272114	0.609282
DVL3|Dvl3	-0.03162	0.627419	0.82548
CDH1|E-Cadherin	-0.0246079	0.70566	0.850307
EGFR|EGFR	0.0361379	0.579063	0.80791
EGFR|EGFR_pY1068	0.0484022	0.45735	0.735571
EGFR|EGFR_pY1173	0.0722782	0.266725	0.609282
ESR1|ER-alpha	-0.0281484	0.665703	0.84247
ESR1|ER-alpha_pS118	0.0436739	0.502513	0.763662
ERCC1|ERCC1	0.0273767	0.674338	0.845111
MAPK1|ERK2	-0.130408	0.0444491	0.19497
ETS1|ETS-1	-0.0836394	0.198517	0.50413
FASN|FASN	-0.0710955	0.27465	0.609282
FOXO3|FOXO3a	0.0885031	0.173563	0.485474
FOXO3|FOXO3a_pS318_S321	0.00154395	0.981097	0.981097
FN1|Fibronectin	-0.122604	0.0589437	0.237003
FOXM1|FoxM1	-0.0846221	0.193277	0.50413
G6PD|G6PD	-0.144173	0.0261409	0.160479
GAB2|GAB2	-0.143709	0.0266311	0.160479
GAPDH|GAPDH	0.0555928	0.393222	0.696255
GATA3|GATA3	-0.0712624	0.273522	0.609282
GATA6|GATA6	0.00666987	0.920925	0.960565
ERBB2|HER2	-0.0414894	0.524143	0.780838
ERBB2|HER2_pY1248	0.00200593	0.975443	0.981097
ERBB3|HER3	-0.066327	0.308213	0.642245
ERBB3|HER3_pY1289	0.112683	0.0827814	0.301449
HSPA1A|HSP70	0.184666	0.00425634	0.0436732
NRG1|Heregulin	0.0620103	0.340829	0.642245
IGFBP2|IGFBP2	0.0781115	0.229931	0.54941
INPP4B|INPP4B	-0.070488	0.278783	0.611421
IRS1|IRS1	0.249604	9.933e-05	0.00579464
MAPK9|JNK2	0.159657	0.0136653	0.12559
MAPK8|JNK_pT183_pY185	0.0189342	0.771365	0.891457
XRCC5|Ku80	-0.00668851	0.918246	0.960565
STK11|LKB1	0.0617219	0.343083	0.642245
LCK|Lck	-0.143841	0.0264905	0.160479
MAP2K1|MEK1	-0.0677152	0.298175	0.6333
MAP2K1|MEK1_pS217_S221	0.00906607	0.889347	0.953682
ERRFI1|MIG-6	-0.100054	0.123732	0.39148
MSH2|MSH2	0.0358717	0.581863	0.80791
MSH6|MSH6	0.0279549	0.667865	0.84247
MYH11|MYH11	0.0842014	0.195507	0.50413
MRE11A|Mre11	0.061956	0.341253	0.642245
MYH9|Myosin-IIa	-0.157423	0.0183923	0.132556
MYH9|Myosin-IIa_pS1943	-0.135742	0.0363669	0.184706
CDH2|N-Cadherin	0.130741	0.0439032	0.19497
NRAS|N-Ras	0.0445008	0.49445	0.757371
NDRG1|NDRG1_pT346	0.0413087	0.525953	0.780838
NFKB1|NF-kB-p65_pS536	-0.0646144	0.320899	0.642245
NF2|NF2	-0.0321821	0.621309	0.82548
NOTCH1|Notch1	0.0627838	0.334829	0.642245
CDH3|P-Cadherin	-0.0289264	0.657044	0.84247
SERPINE1|PAI-1	-0.0463438	0.476728	0.754168
PARP1|PARP1	-0.00874402	0.894386	0.953682
PARP1|PARP_cleaved	0.0413835	0.525204	0.780838
PCNA|PCNA	-0.0567927	0.383074	0.684567
PDCD4|PDCD4	0.0533114	0.412958	0.703621
PDK1|PDK1	-0.0530097	0.41561	0.703621
PDK1|PDK1_pS241	-0.121659	0.0609375	0.238913
PEA15|PEA15	-0.0828176	0.202979	0.508767
PEA15|PEA15_pS116	-0.0458632	0.481316	0.755235
PIK3CA |PI3K-p110-alpha	-0.200121	0.00191888	0.0231465
PRKCA |PKC-alpha	0.00183725	0.977507	0.981097
PRKCA |PKC-alpha_pS657	0.00607476	0.925725	0.960565
PRKCD|PKC-delta_pS664	-0.0889589	0.17135	0.485474
PRKCB|PKC-pan_BetaII_pS660	-0.0144287	0.824754	0.920101
PGR|PR	0.213564	0.000914172	0.0176435
AKT1S1|PRAS40_pT246	-0.0061936	0.924277	0.960565
PRDX1|PRDX1	-0.215752	0.000806719	0.0176435
PREX1|PREX1	-0.134522	0.0380967	0.18853
PTEN|PTEN	-0.0110164	0.865747	0.941658
PXN|Paxillin	0.0613404	0.34608	0.642245
RBM15|RBM15	0.0326712	0.616014	0.82548
RAB25|Rab25	-0.00368117	0.95495	0.980348
RAD50|Rad50	0.0931718	0.151876	0.450955
RAD51|Rad51	-0.0217626	0.738373	0.879666
RPTOR|Raptor	-0.0548883	0.399255	0.700511
RB1|Rb	0.109883	0.0907607	0.324386
RB1|Rb_pS807_S811	-0.0131233	0.840386	0.932152
RICTOR|Rictor	0.0126431	0.846153	0.933186
RICTOR|Rictor_pT1135	0.10555	0.104308	0.353184
RPS6|S6	0.0072315	0.911635	0.960565
RPS6|S6_pS235_S236	0.0676555	0.298602	0.6333
RPS6|S6_pS240_S244	0.0942284	0.147265	0.444097
SCD|SCD	-0.0802684	0.21728	0.530823
SETD2|SETD2	0.0305296	0.639343	0.833738
SRSF1|SF2	0.121215	0.0618944	0.238913
SLC1A5|SLC1A5	-0.190099	0.00429944	0.0436732
STAT3|STAT3_pY705	0.106022	0.102761	0.353184
STAT5A|STAT5-alpha	-0.157053	0.0152995	0.128383
SHC1|Shc_pY317	0.00223425	0.972648	0.981097
DIABLO|Smac	-0.0367307	0.572849	0.80791
SMAD1|Smad1	-0.215324	0.000826758	0.0176435
SMAD3|Smad3	0.232566	0.000296075	0.00979738
SMAD4|Smad4	-0.0198942	0.760117	0.886928
SNAI1|Snail	-0.0196605	0.76285	0.886928
SRC|Src	0.22872	0.000374809	0.010334
SRC|Src_pY416	-0.0917302	0.158342	0.456119
SRC|Src_pY527	0.232107	0.000304582	0.00979738
STMN1|Stathmin	0.025843	0.691623	0.850307
SYK|Syk	-0.147023	0.023295	0.157424
WWTR1|TAZ	0.0203281	0.75505	0.886928
TFRC|TFRC	-0.0839909	0.196631	0.50413
TIGAR|TIGAR	-0.0336738	0.605222	0.822591
TSC1|TSC1	-0.119834	0.0649453	0.245773
TGM2|Transglutaminase	-0.101286	0.119149	0.383264
TSC2|Tuberin	-0.0508911	0.434519	0.71677
TSC2|Tuberin_pT1462	0.0595486	0.360378	0.662408
KDR|VEGFR2	0.0631185	0.332253	0.642245
VHL|VHL	0.0364632	0.575649	0.80791
XBP1|XBP1	-0.0363498	0.576838	0.80791
XRCC1|XRCC1	0.0379476	0.560193	0.80791
YAP1|YAP	0.252019	8.4549e-05	0.00579464
YAP1|YAP_pS127	0.203877	0.00156703	0.0201625
YBX1|YB-1	-0.0822116	0.206316	0.510499
YBX1|YB-1_pS102	-0.11321	0.0813449	0.301449
CTNNB1|beta-Catenin	0.0968655	0.136223	0.417317
JUN|c-Jun_pS73	0.1307	0.0439707	0.19497
KIT|c-Kit	0.246729	0.000120096	0.00579464
MET|c-Met	0.0856146	0.188086	0.50413
MET|c-Met_pY1235	0.0379596	0.560069	0.80791
MYC|c-Myc	-0.0501532	0.441219	0.721654
BIRC2 |cIAP	-0.00868999	0.893909	0.953682
EEF2|eEF2	-0.0630971	0.332417	0.642245
EEF2K|eEF2K	-0.157681	0.0148908	0.128383
EIF4E|eIF4E	-0.14296	0.0274395	0.160479
EIF4G1|eIF4G	-0.203881	0.00156665	0.0201625
MTOR|mTOR	-0.0363609	0.576722	0.80791
MTOR|mTOR_pS2448	0.0205656	0.752281	0.886928
CDKN1A|p21	-0.014467	0.824296	0.920101
CDKN1B|p27	-0.0445568	0.493906	0.757371
CDKN1B|p27_pT157	-0.0348159	0.593032	0.817537
CDKN1B|p27_pT198	-0.0926035	0.154401	0.451505
MAPK14|p38_MAPK	-0.00428514	0.947569	0.977972
MAPK14|p38_pT180_Y182	-0.025438	0.696215	0.850307
TP53|p53	-0.140752	0.0299461	0.169988
SQSTM1|p62-LCK-ligand	-0.302765	1.95132e-06	0.000376605
RPS6KB1|p70S6K	-0.0314994	0.628733	0.82548
RPS6KB1|p70S6K_pT389	0.20433	0.00152883	0.0201625
RPS6KA1|p90RSK	-0.0465686	0.47459	0.754168
RPS6KA1|p90RSK_pT359_S363	0.0295522	0.650111	0.84209
